# Supplementary material for: Loading Effects of Aminoclays in Co-Culture of Two Cyanobacterial Microcystis and Anabaena Species as an Algicidal Role
Source: MDPI journal article supplement (doi:10.3390/app11125607), 2021-06-17
Supplement: s1 [file s1]

# Loading Effects of Aminoclays in Co-Culture of Two Cyanobacterial *Microcystis* and *Anabaena* Species as an Algicidal Role

Minh Kim Nguyen <sup>1,2</sup>, Vu Khac Hoang Bui <sup>1</sup>, Chi-Yong Ahn <sup>3,4</sup>, Hee-Mock Oh <sup>3,4</sup>, Jin-Soo Koh <sup>1</sup>, Ju-Young Moon <sup>5</sup> and Young-Chul Lee <sup>1,\*</sup>

<sup>1</sup> Department of BioNano Technology, Gachon University, 1342 Seongnamdaero, Sujeong-gu, Seongnam-si 13120, Gyeonggi-do, Korea; kimminhndn@gmail.com (M.K.N.); hoangvu210190@gmail.com (V.K.H.B.); jinsoo3645\_@naver.com (J.-S.K.)

<sup>2</sup> Department of Chemical Engineering – Environment, The University of Danang, University of Technology and Education, 48 Cao Thang St., Hai Chau Dist., Danang City 550000, Viet Nam

<sup>3</sup> Cell Factory Research Center, Korea Research Institute of Bioscience and Biotechnology, 125 Gwahak-ro, Daejeon 34141, Korea; cyahn@kribb.re.kr (C.-Y.A.); heemock@kribb.re.kr (H.-M.O.)

<sup>4</sup> Green Chemistry and Environmental Biotechnology, University of Science and Technology, 217 Gajeong-ro, Daejeon 34113, Korea

<sup>5</sup> Department of Beauty Design Management, Hansung University, 116 Samseongyoro-16gil, Seoul 02876, Korea; bora7033@naver.com (J.-Y.M.)

\* Correspondence: dreamdb@gachon.ac.kr; Tel.: +82-31-750-8751; Fax.: +82-31-755-7405

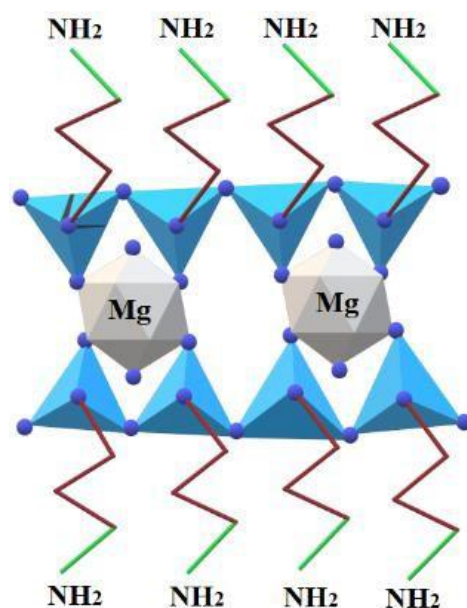

**Figure S1.** Ideal three-dimensional structure of MgAC, reproduced with the permission from reference (Yang *et al.*, 2014).

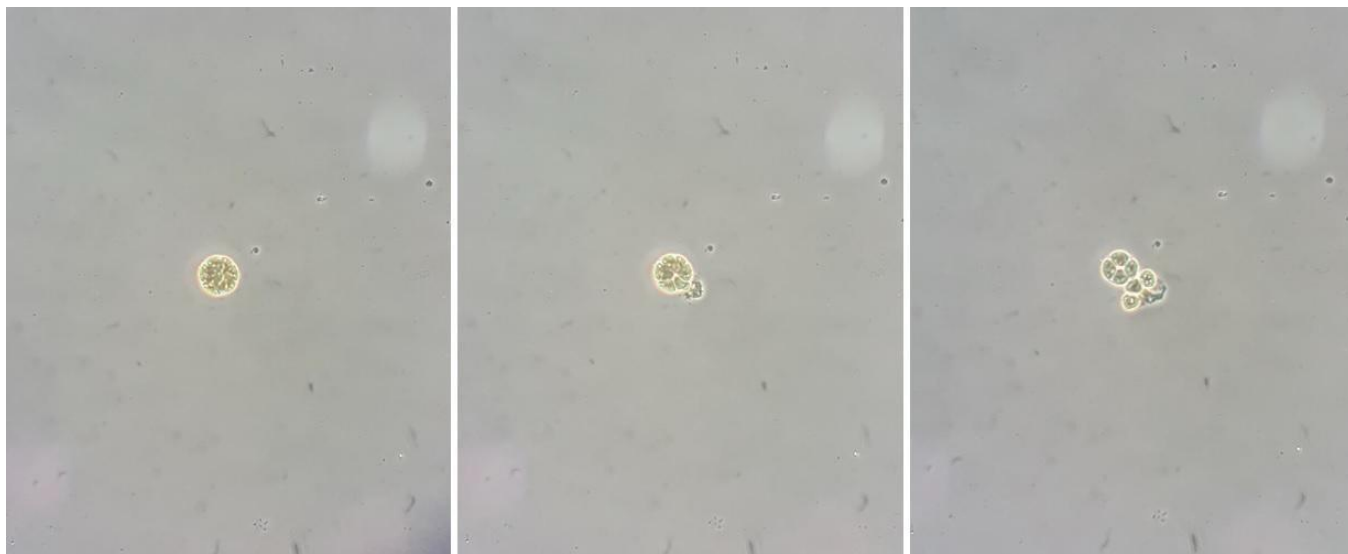

**Figure S2.** Optical microscope images of cell lysis of *Microcystis* sp. KW due to AC (0.1 g/L) loading. It is noted that the white bars are 10  $\mu\text{m}$  scale.

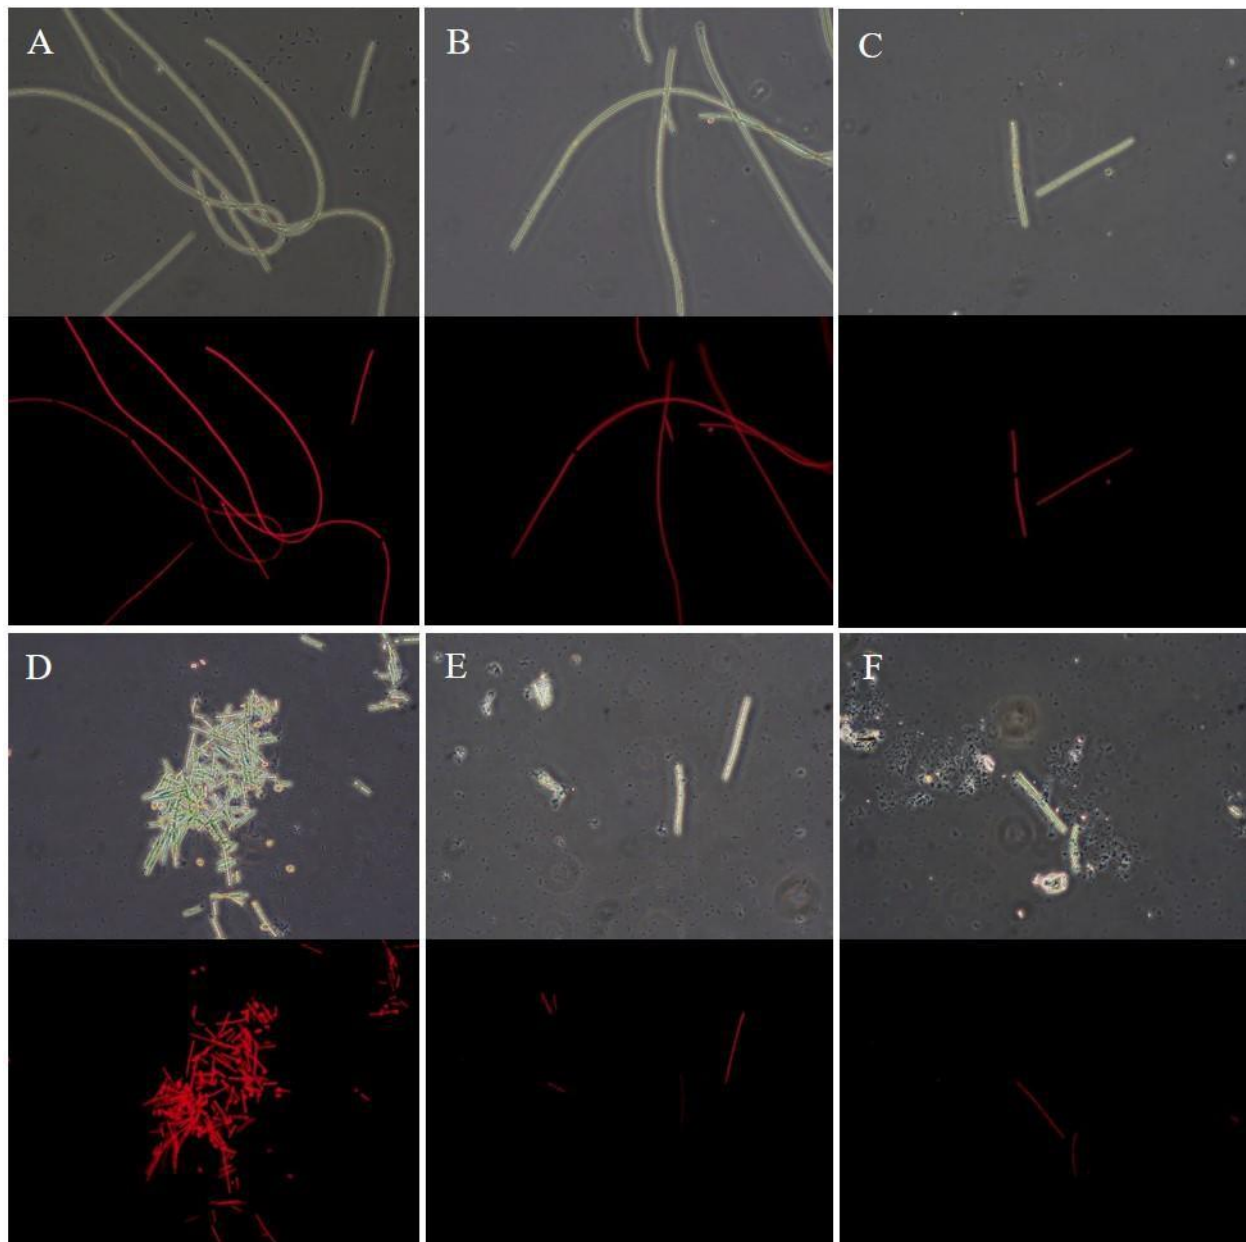

**Figure S3.** Optical microscope and fluorescent images of cell lysis of *Anabaena* sp. KVSF7 due to aminoclay (0.1 g/L) loading after (A) 0 day; (B) 2 days; (C) 4 days; (D) 6 days; (E) 8 days; (F) 10 days. It is noted that the white bars are 10 μm scale.

**Table S1.** Mono-culture and co-culture experimental designs of two cyanobacterial *Microcystis* and *Anabaena* species.

| Run | Treatment   | Strains      | MgAC | CaAC | AlAC |
|-----|-------------|--------------|------|------|------|
| 1   | Controls    | M.S          | -    | -    | -    |
| 2   |             | A.S.         | -    | -    | -    |
| 3   |             | M.S          | +    | -    | -    |
| 4   |             | A.S.         | +    | -    | -    |
| 5   | Co-cultures | M.S and A.S. | ++   | -    | -    |
| 6   |             |              | -    | ++   | -    |
| 7   |             |              | -    | -    | ++   |

M.A. represents *Microcystis* sp. KW. A.S. represents *Anabaena* sp. KVSF7. “+” means the experiment involves the type of AC, “-” means the experiment does not involve the type of AC. “\*” means that the AC doses are 0.01, 0.02, 0.05, 0.1, 0.5, and 1.0 g/L. “\*\*” means that the AC doses are 0.01, 0.05, 0.1, 0.5, and 1.0 g/L.

**Table S2.** Experimental designs to test the effect of *Microcystis* sp. KW cell free medium (MSCFM\*) and CaAC on *Anabaena* sp. KVSF7.

| Run | Treatment  | Strains | Medium                   |
|-----|------------|---------|--------------------------|
| 1   | Control    | A.S.    | BG11                     |
| 2   | Treatments | A.S.    | MSCFM + 0.01 g/L<br>CaAC |
| 3   |            | A.S.    | MSCFM + 0.05 g/L<br>CaAC |
| 4   |            | A.S.    | MSCFM + 0.1 g/L<br>CaAC  |
| 5   |            | A.S.    | MSCFM + 0.25 g/L<br>CaAC |
| 6   |            | A.S.    | MSCFM + 0.5 g/L<br>CaAC  |
