# Supplementary material for: Loading Effects of Aminoclays in Co-Culture of Two Cyanobacterial Microcystis and Anabaena Species as an Algicidal Role
Source: MDPI journal article supplement (doi:10.3390/app11125607), 2021-06-17
Supplement: s1 [file s1]

Archive with 1 entries (1 files):
- applsci-1233625-supplementary.pdf
